# Supplementary material for: Persistent Colonisation of Antimicrobial Silver-Impregnated Shower Heads and Hoses Presents A Risk for Acquisition of Pseudomonas Aeruginosa in Healthcare Settings
Source: Research Square preprint supplement (doi:10.21203/rs.3.rs-1403389/v1), 2022-03-29
Supplement: Supplementary file 1 [file 020019e89eb1cfb501c7fc12.xlsx]

## Sheet: A-SH
Period	Shower number	TCC	TZP	AK	CAZ	FEP	PRL	CIP	TOB	ATM	IPM	CN	MEM		TZP	CAZ	IPM	MEM	ATM	AK	CN	TOB	CIP	PRL	FEP	TCC
1	10	24	24	23	25	18	23	28	22	26	20	18	32		I	I	I	S	I	S	insufficient evidence	S	I	I	R	I
1	6	21	21	26	24	25	24	34	24	24	26	20	35		I	I	I	S	I	S	insufficient evidence	S	I	I	I	I
3	10	24	27	22	25	18	25	31	23	25	18	17	32		I	I	R	S	I	S	insufficient evidence	S	I	I	R	I
3	1	22	28	29	27	26	26	38	25	22	26	22	35		I	I	I	S	I	S	insufficient evidence	S	I	I	I	I
3	3	21	29	24	27	25	22	34	21	23	27	18	32		I	I	I	S	I	S	insufficient evidence	S	I	I	I	I
3	4	22	27	28	28	25	24	34	24	24	24	22	35		I	I	I	S	I	S	insufficient evidence	S	I	I	I	I
3	9	26	27	24	26	19	24	32	23	26	20	18	33		I	I	I	S	I	S	insufficient evidence	S	I	I	R	I
3	3	20	23	20	21	25	22	32	20	18	22	15	30		I	I	I	S	I	S	insufficient evidence	S	I	I	I	I
3	1	19	21	23	20	24	23	36	24	18	24	20	26		I	I	I	S	I	S	insufficient evidence	S	I	I	I	I
3	4	20	24	22	22	25	23	34	22	19	24	18	25		I	I	I	S	I	S	insufficient evidence	S	I	I	I	I
3	1	26	26	14	28	26	24	38	17	30	21	11	36		I	I	I	S	I	R	insufficient evidence	R	I	I	I	I
3	1	22	26	24	22	26	25	38	26	17	23	21	28		I	I	I	S	R	S	insufficient evidence	S	I	I	I	I
3	4	20	23	23	21	23	23	36	24	18	23	19	26		I	I	I	S	I	S	insufficient evidence	S	I	I	I	I
3	6	20	24	22	22	25	25	36	23	23	23	18	27		I	I	I	S	I	S	insufficient evidence	S	I	I	I	I
1	3	20	23	20	24	25	22	34	20	23	24	15	34		I	I	I	S	I	S	insufficient evidence	S	I	I	I	I
1	7	24	24	21	24	20	23	32	18	24	20	16	30		I	I	I	S	I	S	insufficient evidence	S	I	I	R	I
1	10	24	24	22	24	20	22	28	21	22	20	16	26		I	I	I	S	I	S	insufficient evidence	S	I	I	R	I
1	6	20	22	22	24	28	22	36	20	22	25	19	32		I	I	I	S	I	S	insufficient evidence	S	I	I	I	I
1	7	22	24	21	25	26	23	28	18	24	19	16	30		I	I	R	S	I	S	insufficient evidence	S	I	I	I	I
2	1	23	28	27	25	25	25	32	25	23	25	20	32		I	I	I	S	I	S	insufficient evidence	S	I	I	I	I
2	1	20	22	24	22	24	20	34	22	22	22	20	30		I	I	I	S	I	S	insufficient evidence	S	I	I	I	I
2	6	21	24	24	23	25	22	36	22	24	24	20	32		I	I	I	S	I	S	insufficient evidence	S	I	I	I	I
2	10	19	23	22	22	24	22	34	22	22	25	18	36		I	I	I	S	I	S	insufficient evidence	S	I	I	I	I
2	4	18	22	20	22	26	22	36	20	22	24	17	31		I	I	I	S	I	S	insufficient evidence	S	I	I	I	I
2	4	21	24	24	24	28	22	36	22	20	24	20	34		I	I	I	S	I	S	insufficient evidence	S	I	I	I	I
2	6	20	24	24	22	28	24	36	24	24	24	20	32		I	I	I	S	I	S	insufficient evidence	S	I	I	I	I
2	9	22	22	20	22	22	22	28	20	24	18	16	30		I	I	R	S	I	S	insufficient evidence	S	I	I	I	I
2	1	22	24	25	27	23	22	26	24	25	23	21	34		I	I	I	S	I	S	insufficient evidence	S	I	I	I	I
2	4	23	28	24	28	27	24	38	22	24	24	20	36		I	I	I	S	I	S	insufficient evidence	S	I	I	I	I
2	9	26	24	20	28	22	22	23	17	26	18	16	31		I	I	R	S	I	S	insufficient evidence	R	R	I	I	I
2	1	19	21	21	21	25	21	34	21	20	23	18	31		I	I	I	S	I	S	insufficient evidence	S	I	I	I	I
2	4	19	20	22	22	25	21	36	22	20	22	19	30		I	I	I	S	I	S	insufficient evidence	S	I	I	I	I
2	6	20	24	24	25	24	24	38	21	19	22	19	30		I	I	I	S	I	S	insufficient evidence	S	I	I	I	I
2	6	20	24	19	25	32	22	36	20	22	23	16	28		I	I	I	S	I	S	insufficient evidence	S	I	I	I	I
2	9	22	22	20	22	21	22	28	22	22	17	17	30		I	I	R	S	I	S	insufficient evidence	S	I	I	I	I

## Sheet: A-SD
Period	Shower number	TCC	TZP	AK	CAZ	FEP	PRL	CIP	TOB	ATM	IPM	CN	MEM		TZP	CAZ	IPM	MEM	ATM	AK	CN	TOB	CIP	PRL	FEP	TCC
1	5	20	22	18	28	25	24	34	20	22	24	16	30		I	I	I	S	I	S	insufficient evidence	S	I	I	I	I
1	5	20	24	20	24	26	22	32	21	24	24	15	30		I	I	I	S	I	S	insufficient evidence	S	I	I	I	I
2	5	20	22	20	23	26	20	32	20	22	24	16	32		I	I	I	S	I	S	insufficient evidence	S	I	I	I	I
2	6	22	22	26	24	28	24	42	24	22	24	20	34		I	I	I	S	I	S	insufficient evidence	S	I	I	I	I
2	6	18	21	24	20	23	23	35	22	21	22	18	31		I	I	I	S	I	S	insufficient evidence	S	I	I	I	I
2	6	20	22	22	22	26	24	36	22	22	22	18	32		I	I	I	S	I	S	insufficient evidence	S	I	I	I	I
2	1	19	21	22	22	21	22	34	21	20	23	19	30		I	I	I	S	I	S	insufficient evidence	S	I	I	I	I
2	4	20	22	24	22	21	22	38	23	22	24	19	30		I	I	I	S	I	S	insufficient evidence	S	I	I	I	I
2	6	19	22	24	24	27	22	36	24	22	24	20	32		I	I	I	S	I	S	insufficient evidence	S	I	I	I	I
2	9	24	23	20	25	21	23	26	22	24	19	17	28		I	I	R	S	I	S	insufficient evidence	S	I	I	I	I
3	1	21	23	23	23	26	22	38	24	21	24	19	32		I	I	I	S	I	S	insufficient evidence	S	I	I	I	I
3	4	19	22	23	23	25	23	38	23	20	23	18	30		I	I	I	S	I	S	insufficient evidence	S	I	I	I	I
3	9	23	23	20	21	15	22	29	21	21	17	16	22		I	I	R	I	I	S	insufficient evidence	S	I	I	R	I
3	6	19	23	25	26	28	24	42	25	20	21	19	27		I	I	I	S	I	S	insufficient evidence	S	I	I	I	I
3	1	21	23	24	20	24	23	38	23	20	24	20	26		I	I	I	S	I	S	insufficient evidence	S	I	I	I	I
3	5	21	24	25	21	24	23	38	24	20	23	20	27		I	I	I	S	I	S	insufficient evidence	S	I	I	I	I
3	6	21	24	25	20	25	24	38	24	18	23	19	26		I	I	I	S	I	S	insufficient evidence	S	I	I	I	I
3	8	24	27	24	25	30	25	33	22	22	26	19	22		I	I	I	I	I	S	insufficient evidence	S	I	I	I	I
3	10	21	23	21	24	23	24	28	22	25	19	18	34		I	I	R	S	I	S	insufficient evidence	S	I	I	I	I
3	4	20	23	23	23	25	23	37	26	25	25	19	36		I	I	I	S	I	S	insufficient evidence	S	I	I	I	I
3	6	21	24	24	22	25	22	38	24	22	25	19	33		I	I	I	S	I	S	insufficient evidence	S	I	I	I	I
3	9	23	26	24	25	26	25	38	23	26	24	19	34		I	I	I	S	I	S	insufficient evidence	S	I	I	I	I
3	1	22	22	19	23	21	23	29	20	25	19	16	32		I	I	R	S	I	S	insufficient evidence	S	I	I	I	I
3	4	20	26	23	25	26	25	36	23	20	22	19	34		I	I	I	S	I	S	insufficient evidence	S	I	I	I	I
3	6	20	21	22	22	25	22	35	23	21	24	18	32		I	I	I	S	I	S	insufficient evidence	S	I	I	I	I

## Sheet: B-SH
Period	Shower number	TCC	TZP	AK	CAZ	FEP	PRL	CIP	TOB	ATM	IPM	CN	MEM		TZP	CAZ	IPM	MEM	ATM	AK	CN	TOB	CIP	PRL	FEP	TCC
1	12	22	23	20	25	20	23	27	21	23	18	17	32		I	I	R	S	I	S	insufficient evidence	S	I	I	R	I
1	13	23	23	23	24	26	25	34	24	24	28	18	40		I	I	I	S	I	S	insufficient evidence	S	I	I	I	I
1	16	24	26	20	26	20	25	29	24	25	18	17	34		I	I	R	S	I	S	insufficient evidence	S	I	I	R	I
3	15	18	22	21	30	26	24	30	25	19	22	21	26		I	I	I	S	I	S	insufficient evidence	S	I	I	I	I
3	16	21	24	18	24	24	24	29	21	22	17	16	30		I	I	R	S	I	S	insufficient evidence	S	I	I	I	I
3	16	12	23	20	22	21	19	32	22	14	16	16	26		I	I	R	S	R	S	insufficient evidence	S	I	I	I	R
3	18	25	25	21	23	26	26	35	23	23	25	18	34		I	I	I	S	I	S	insufficient evidence	S	I	I	I	I
3	13	21	26	21	23	29	25	36	21	25	25	16	36		I	I	I	S	I	S	insufficient evidence	S	I	I	I	I
3	11	22	23	21	22	26	23	36	22	25	24	17	37		I	I	I	S	I	S	insufficient evidence	S	I	I	I	I
3	12	26	28	25	27	29	26	37	24	26	26	18	33		I	I	I	S	I	S	insufficient evidence	S	I	I	I	I
3	17	28	28	19	27	34	26	38	21	30	25	16	40		I	I	I	S	I	S	insufficient evidence	S	I	I	I	I
3	13	24	25	24	25	33	25	36	23	26	23	21	31		I	I	I	S	I	S	insufficient evidence	S	I	I	I	I
3	11	26	28	26	30	32	28	38	23	26	26	18	32		I	I	I	S	I	S	insufficient evidence	S	I	I	I	I
3	12	28	26	14	28	26	22	34	18	30	18	12	32		I	I	R	S	I	R	insufficient evidence	S	I	I	I	I
3	15	18	23	21	21	24	23	30	21	18	28	16	32		I	I	I	S	I	S	insufficient evidence	S	I	I	I	I
3	16	11	17	20	21	21	17	28	22	14	19	16	30		R	I	R	S	R	S	insufficient evidence	S	I	R	I	R
1	20	22	24	20	24	26	24	34	20	22	24	16	32		I	I	I	S	I	S	insufficient evidence	S	I	I	I	I
1	11	24	26	24	24	30	26	36	22	16	25	18	28		I	I	I	S	R	S	insufficient evidence	S	I	I	I	I
1	12	22	22	18	22	22	20	28	20	20	17	15	24		I	I	R	S	I	S	insufficient evidence	S	I	I	I	I
1	16	22	24	17	22	23	24	28	20	19	16	15	26		I	I	R	S	I	S	insufficient evidence	S	I	I	I	I
1	17	20	24	20	24	28	24	32	22	20	24	14	32		I	I	I	S	I	S	insufficient evidence	S	I	I	I	I
1	17	20	24	20	24	26	24	36	20	20	22	10	32		I	I	I	S	I	S	insufficient evidence	S	I	I	I	I
1	18	22	22	26	22	25	24	36	20	15	17	18	30		I	I	R	S	R	S	insufficient evidence	S	I	I	I	I
1	12	22	23	17	24	22	24	30	20	22	18	14	32		I	I	R	S	I	S	insufficient evidence	S	I	I	I	I
1	15	17	23	20	23	26	22	30	20	18	28	16	30		I	I	I	S	I	S	insufficient evidence	S	I	I	I	R
1	17	20	23	20	23	26	23	34	20	22	23	15	34		I	I	I	S	I	S	insufficient evidence	S	I	I	I	I
1	18	22	24	21	23	26	21	28	21	22	10	15	18		I	I	R	I	I	S	insufficient evidence	S	I	I	I	I
2	11	26	30	24	28	29	26	38	22	30	27	20	34		I	I	I	S	I	S	insufficient evidence	S	I	I	I	I
2	12	21	28	23	25	29	25	36	23	25	28	18	36		I	I	I	S	I	S	insufficient evidence	S	I	I	I	I
2	18	24	28	25	30	26	27	38	24	26	24	22	34		I	I	I	S	I	S	insufficient evidence	S	I	I	I	I
2	20	19	18	18	20	24	20	26	19	17	26	17	28		I	I	I	S	R	S	insufficient evidence	S	I	I	I	I
2	13	22	20	18	20	28	24	36	20	24	24	16	36		I	I	I	S	I	S	insufficient evidence	S	I	I	I	I
2	17	20	22	20	22	26	22	32	20	20	20	16	34		I	I	I	S	I	S	insufficient evidence	S	I	I	I	I
2	18	0	8	20	12	20	0	30	20	18	22	17	22		R	R	I	I	I	S	insufficient evidence	S	I	R	R	R
2	11	20	22	22	22	28	24	34	21	22	24	19	28		I	I	I	S	I	S	insufficient evidence	S	I	I	I	I
2	13	20	20	18	24	32	20	34	20	20	21	15	26		I	I	I	S	I	S	insufficient evidence	S	I	I	I	I
2	15	16	19	18	20	15	20	30	20	20	26	15	24		I	I	I	S	I	S	insufficient evidence	S	I	I	R	R
2	11	18	20	20	26	30	20	30	22	22	22	17	22		I	I	I	I	I	S	insufficient evidence	S	I	I	I	I
2	12	22	22	14	26	22	17	30	17	24	15	10	26		I	I	R	S	I	R	insufficient evidence	R	I	R	I	I
2	13	20	20	18	22	26	20	36	20	19	23	15	24		I	I	I	S	I	S	insufficient evidence	S	I	I	I	I
2	15	24	24	20	22	26	23	30	20	24	26	16	30		I	I	I	S	I	S	insufficient evidence	S	I	I	I	I
2	16	20	21	18	23	22	20	28	19	20	16	14	28		I	I	R	S	I	S	insufficient evidence	S	I	I	I	I
2	11	14	25	22	24	29	26	34	20	26	23	19	30		I	I	I	S	I	S	insufficient evidence	S	I	I	I	R
2	13	24	27	18	22	30	24	36	20	24	22	16	30		I	I	I	S	I	S	insufficient evidence	S	I	I	I	I
2	15	18	20	18	20	24	20	30	20	17	28	15	30		I	I	I	S	R	S	insufficient evidence	S	I	I	I	I
2	17	20	22	20	24	26	23	32	21	22	22	15	31		I	I	I	S	I	S	insufficient evidence	S	I	I	I	I
2	16	22	22	18	20	29	20	34	20	20	22	16	30		I	I	I	S	I	S	insufficient evidence	S	I	I	I	I
2	18	19	22	21	23	26	22	34	21	23	23	17	33		I	I	I	S	I	S	insufficient evidence	S	I	I	I	I
2	17	12	12	21	14	24	10	32	20	22	21	14	30		R	R	I	S	I	S	insufficient evidence	S	I	R	I	R
2	15	17	19	19	20	23	19	26	19	18	28	16	31		I	I	I	S	I	S	insufficient evidence	S	I	I	I	R
2	16	21	23	19	23	23	22	32	19	22	17	14	28		I	I	R	S	I	S	insufficient evidence	S	I	I	I	I
2	17	20	21	20	23	25	21	32	21	24	23	15	32		I	I	I	S	I	S	insufficient evidence	S	I	I	I	I
2	18	20	23	21	21	23	22	34	23	22	24	19	32		I	I	I	S	I	S	insufficient evidence	S	I	I	I	I

## Sheet: B-SD
Period	Shower number	TCC	TZP	AK	CAZ	FEP	PRL	CIP	TOB	ATM	IPM	CN	MEM		TZP	CAZ	IPM	MEM	ATM	AK	CN	TOB	CIP	PRL	FEP	TCC
1	12	22	24	20	25	21	24	30	21	25	19	17	32		I	I	R	S	I	S	insufficient evidence	S	I	I	I	I
3	12	28	27	14	29	28	24	36	18	28	19	12	36		I	I	R	S	I	R	insufficient evidence	S	I	I	I	I
3	18	25	25	16	25	30	28	31	23	27	24	18	37		I	I	I	S	I	S	insufficient evidence	S	I	I	I	I
1	17	22	22	21	24	26	24	30	24	16	22	14	32		I	I	I	S	R	S	insufficient evidence	S	I	I	I	I
1	18	20	20	19	24	26	29	30	20	14	24	16	32		I	I	I	S	R	S	insufficient evidence	S	I	I	I	I
1	15	18	19	20	20	19	19	27	21	17	30	18	30		I	I	I	S	R	S	insufficient evidence	S	I	I	R	I
2	11	22	24	22	24	30	24	36	22	26	25	18	30		I	I	I	S	I	S	insufficient evidence	S	I	I	I	I
2	18	27	27	23	26	26	27	28	22	26	28	20	40		I	I	I	S	I	S	insufficient evidence	S	I	I	I	I
3	15	18	19	21	21	20	20	27	21	18	32	18	32		I	I	I	S	I	S	insufficient evidence	S	I	I	R	I
3	17	23	22	22	23	22	22	31	21	24	24	17	32		I	I	I	S	I	S	insufficient evidence	S	I	I	I	I
3	11	28	26	24	26	27	25	31	22	27	26	19	30		I	I	I	S	I	S	insufficient evidence	S	I	I	I	I
3	12	21	19	17	20	13	19	31	20	22	17	15	26		I	I	R	S	I	S	insufficient evidence	S	I	I	R	I
3	17	23	22	21	23	24	21	34	19	25	23	17	34		I	I	I	S	I	S	insufficient evidence	S	I	I	I	I
3	18	24	22	20	24	25	22	30	20	24	23	17	30		I	I	I	S	I	S	insufficient evidence	S	I	I	I	I
1	16	42	40	8	22	26	38	22	0	9	28	9	40		I	I	I	S	R	R	insufficient evidence	R	R	I	I	I
1	16	40	38	20	26	22	36	22	0	10	15	10	34		I	I	R	S	R	S	insufficient evidence	R	R	I	I	I
1	18	25	20	9	24	14	22	16	8	0	24	0	34		I	I	I	S	R	R	insufficient evidence	R	R	I	R	I
1	18	18	20	20	24	26	22	30	22	19	24	16	30		I	I	I	S	I	S	insufficient evidence	S	I	I	I	I
2	15	24	24	18	22	23	22	28	20	22	28	16	35		I	I	I	S	I	S	insufficient evidence	S	I	I	I	I
2	20	20	22	20	20	26	20	32	19	20	22	16	30		I	I	I	S	I	S	insufficient evidence	S	I	I	I	I
2	15	20	25	18	23	28	22	32	20	24	27	15	32		I	I	I	S	I	S	insufficient evidence	S	I	I	I	I
2	16	20	21	17	22	20	20	26	0	14	16	14	27		I	I	R	S	R	S	insufficient evidence	R	I	I	R	I
2	17	19	22	18	20	24	21	32	20	22	9	15	16		I	I	R	R	I	S	insufficient evidence	S	I	I	I	I
2	20	21	20	19	21	24	21	34	20	20	21	15	32		I	I	I	S	I	S	insufficient evidence	S	I	I	I	I
2	12	20	21	17	22	20	20	26	0	14	16	14	27		I	I	R	S	R	S	insufficient evidence	R	I	I	R	I
2	11	25	31	25	28		30	33	24	24	27	20	32		I	I	I	S	I	S	insufficient evidence	S	I	I	R	I
