# Supplementary material for: Persistent Colonisation of Antimicrobial Silver-Impregnated Shower Heads and Hoses Presents A Risk for Acquisition of Pseudomonas Aeruginosa in Healthcare Settings
Source: Research Square preprint supplement (doi:10.21203/rs.3.rs-1403389/v1), 2022-03-29
Supplement: Supplementary file 3 [file 2beddbd4472ebe02d8eba88c.xlsx]

## Sheet: Sheet1
week	prob_shower_a	prob_shower_b	prob_drain_a	prob_drain_b
1	0.317669	0.760135	0.12327	0.318715
2	0.336108	0.757763	0.137183	0.325008
3	0.355061	0.755374	0.152393	0.331365
4	0.374479	0.752969	0.168959	0.337784
5	0.39431	0.750549	0.186929	0.344264
7	0.434972	0.74566	0.227194	0.357397
9	0.476528	0.740709	0.273218	0.370748
11	0.518412	0.735696	0.324649	0.384298
13	0.560038	0.730621	0.38069	0.398031
15	0.600837	0.725485	0.440101	0.411927
17	0.640283	0.720289	0.501278	0.425964
19	0.67792	0.715032	0.562418	0.440121
21	0.713382	0.709717	0.621718	0.454377
